# Supplementary material for: Fully sustainably sourced and closed-loop recyclable underwater adhesive for on-demand erasable electronic sealing
Source: Royal Society of Chemistry journal article supplement (doi:10.1039/d5gc06477e), 2026-01-01
Supplement: d5gc06477e1.pdf [file d5gc06477e1.pdf]

## Supporting Information

### **Fully sustainably sourced and closed-loop recyclable underwater adhesive for on-demand erasable electronic sealing**

Xingle Chen<sup>a</sup>, Zexuan Wang<sup>a</sup>, Mingsong Huang<sup>a</sup>, Qin Zhang<sup>b</sup>, and Xin Liu<sup>a\*</sup>

<sup>a</sup> Polymeric and Soft Materials Laboratory, School of Chemical Engineering and Advanced Institute of Materials Science, Changchun University of Technology, Changchun 130012, China.

<sup>b</sup> Polymeric and Soft Materials Laboratory, School of Chemistry and Life Science and Advanced Institute of Materials Science, Changchun University of Technology, Changchun 130012, China.

Corresponding author: Xin Liu

E-mail: [liuxin@ccut.edu.cn](mailto:liuxin@ccut.edu.cn)

## Supplementary Figures

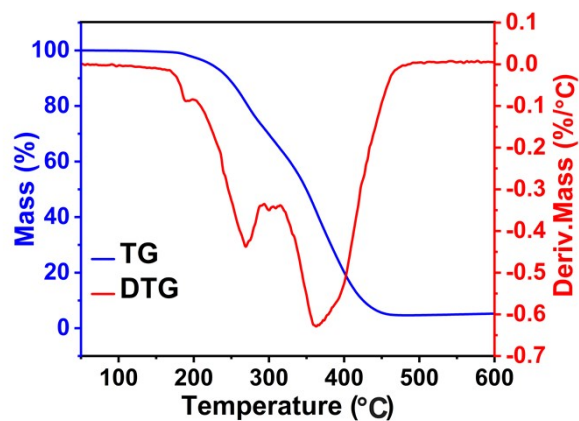

Figure S1. TG and DTG curves of the PTAE adhesive.

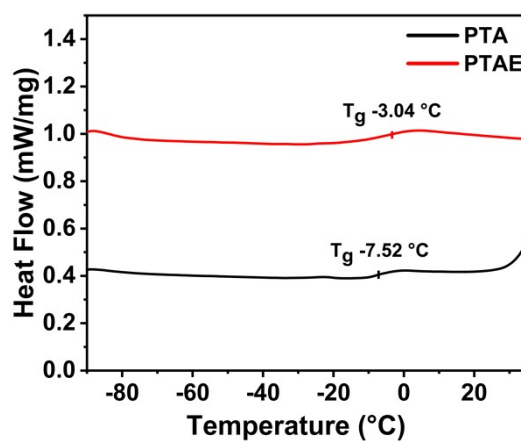

Figure S2. DSC curves of PTA and PTAE.

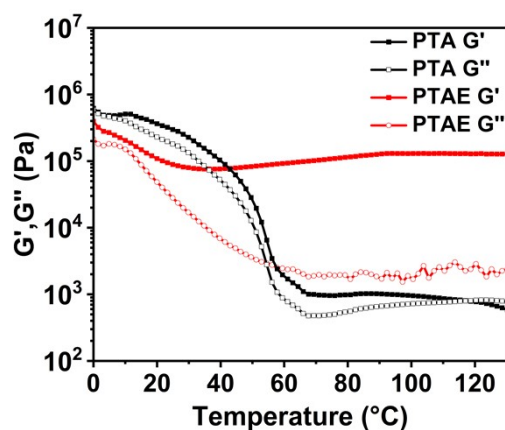

Figure S3. Temperature-dependent rheology of PTA and PTAE.

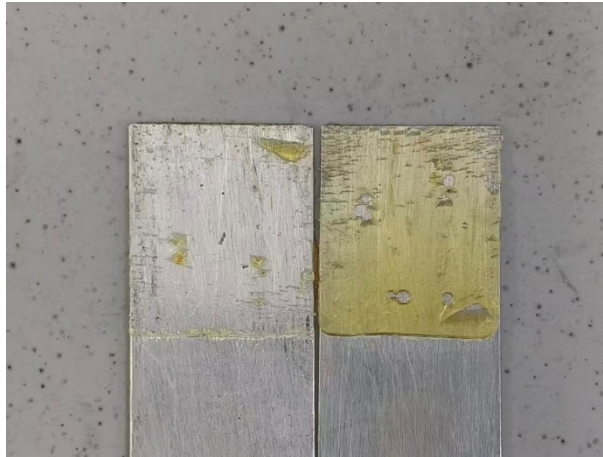

**Figure S4.** The failure mode of the adhesive lap joint of PTAE.

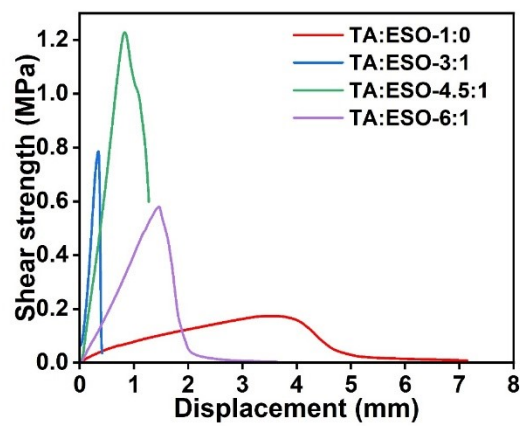

**Figure S5.** The shear adhesion strength of the PTAE adhesive with different ratios of ESO to TA.

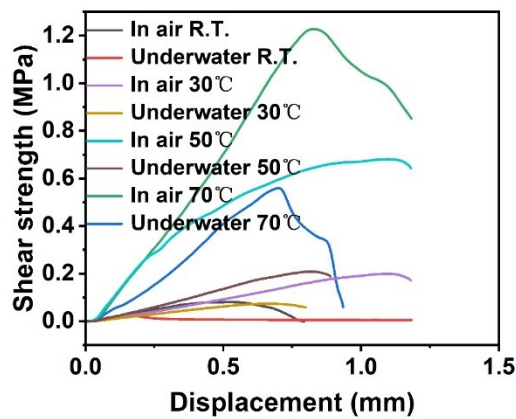

**Figure S6.** The shear adhesion strength of the PTAE adhesive with different curing temperatures.

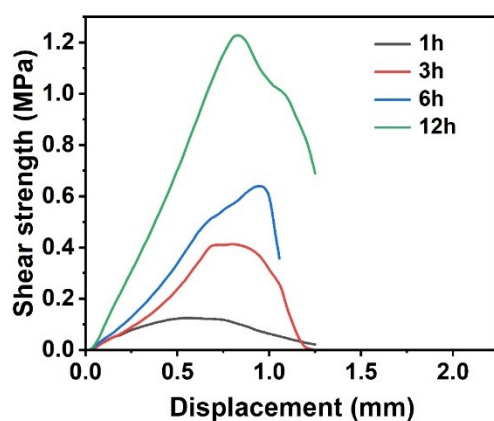

**Figure S7.** The shear adhesion strength of the PTAE adhesive with different curing times.

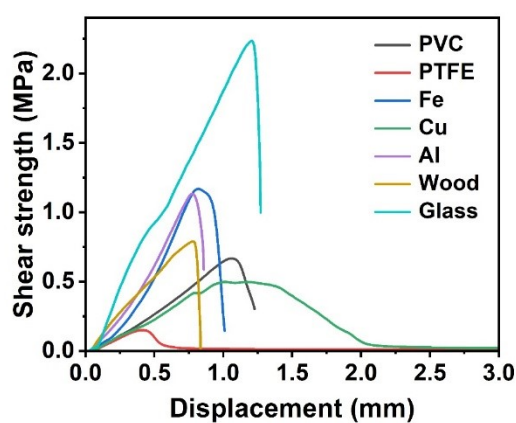

**Figure S8.** The adhesive strength of PTAE to different substrates after being placed for 3 days.

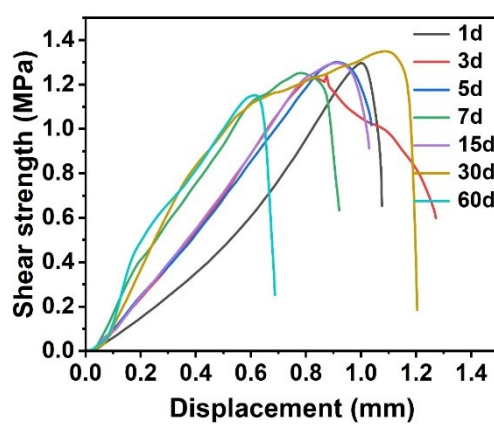

**Figure S9.** Adhesive strength of PTAE in air for 60 days.

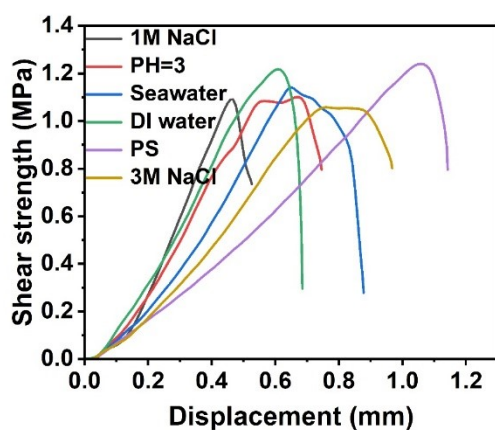

**Figure S10.** The adhesive strength of PTAE was evaluated in different aqueous solutions after 10-day immersion.

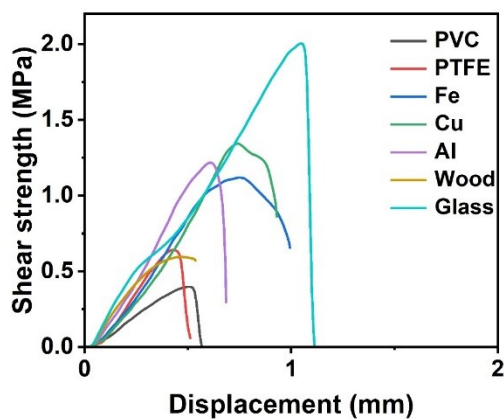

**Figure S11.** PTAE was tested for adhesion to various substrates after 10 days of immersion.

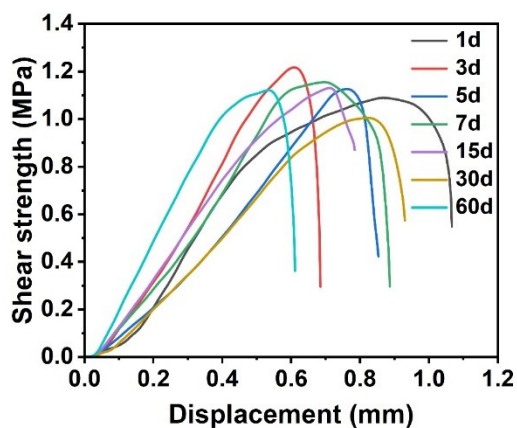

**Figure S12.** The adhesive strength of PTAE was measured before and after immersion in water for 60 days.

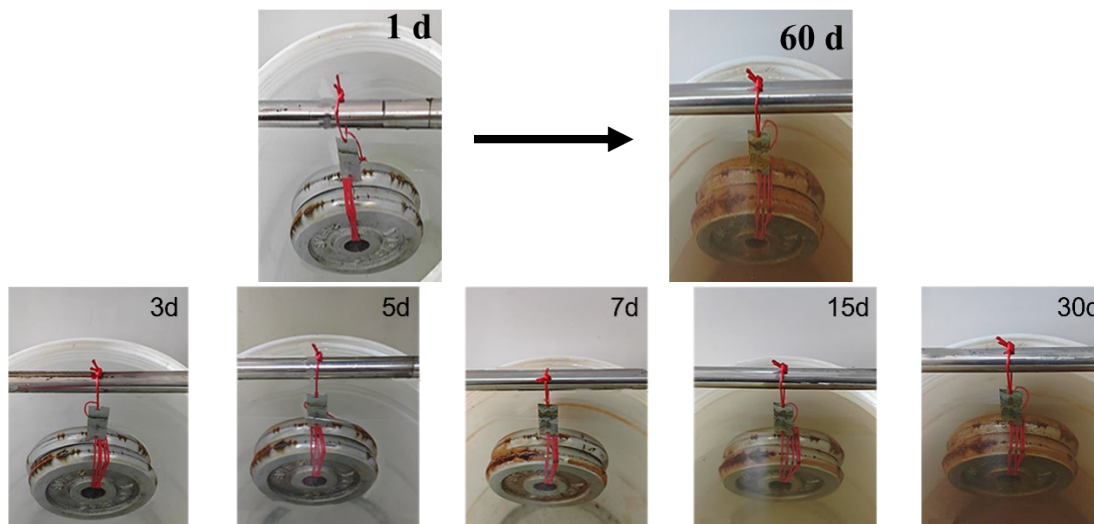

**Figure S13.** During the 60-day immersion, iron samples bonded with PTAE supported a 5 kg weight without failure.

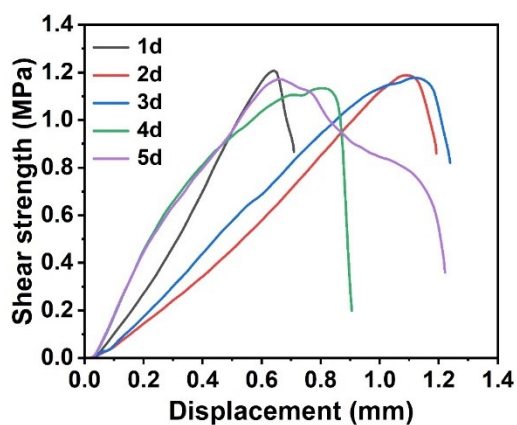

**Figure S14.** The adhesive strength of PTAE was measured under constant temperature (45 °C) and humidity (75% RH).

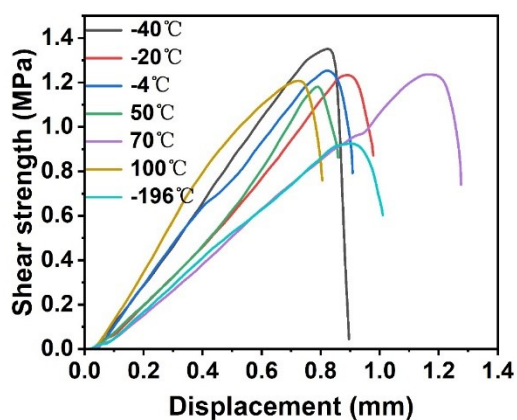

**Figure S15.** PTAE was exposed to temperatures ranging from -40 °C to 100 °C for 24 h and -196 °C (liquid nitrogen) for 5 min, after which its adhesive strength was measured.

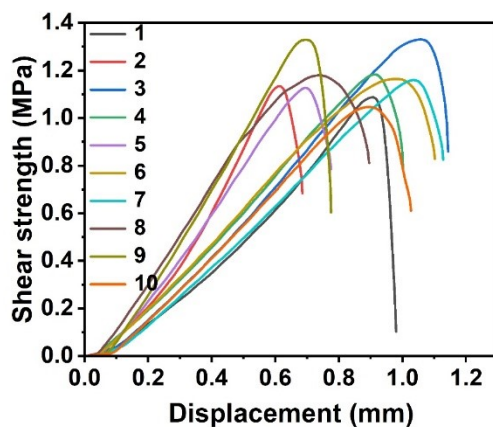

**Figure S16.** PTAE was subjected to 10 thermal cycles, each consisting of 3 h at  $-20\text{ }^{\circ}\text{C}$  followed by 3 h at  $100\text{ }^{\circ}\text{C}$ .

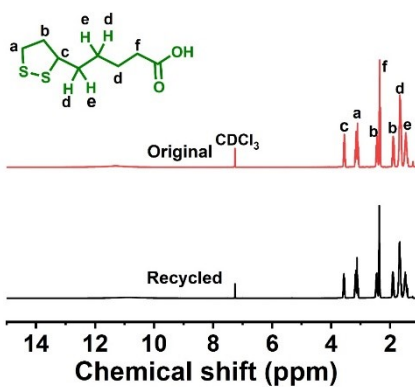

**Figure S17.**  $^1\text{H}$  NMR spectra of the original TA and recycled TA.

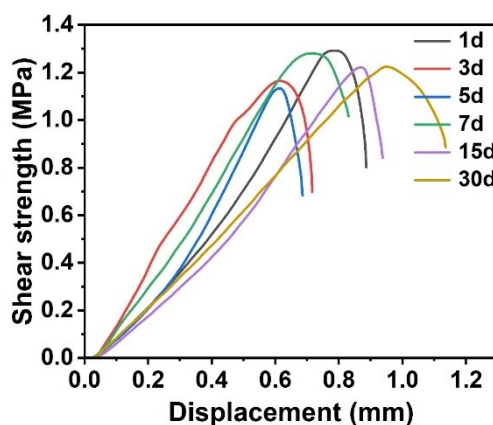

**Figure S18.** Long-term stability of PTAE adhesive after recycling.

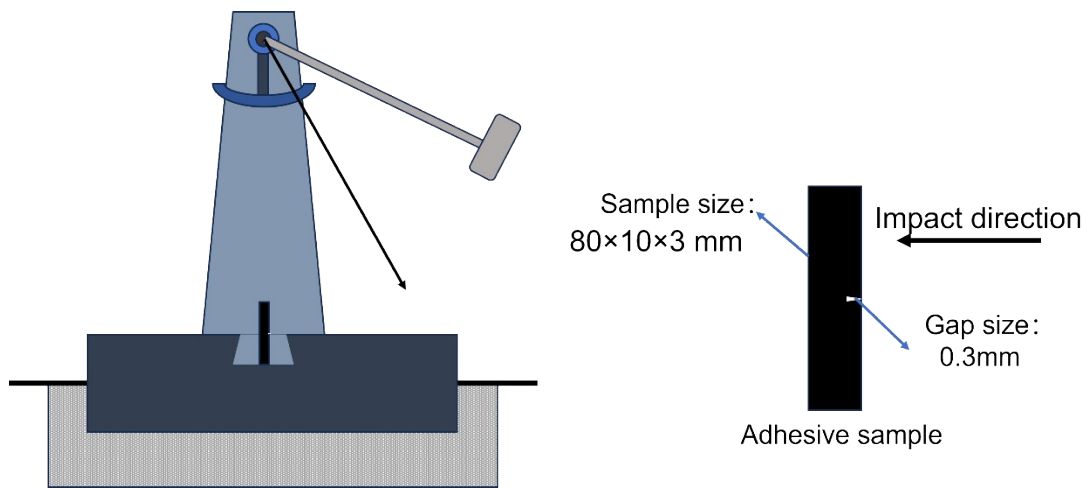

**Figure S19.** Schematic diagram of the cantilever beam impact testing machine.

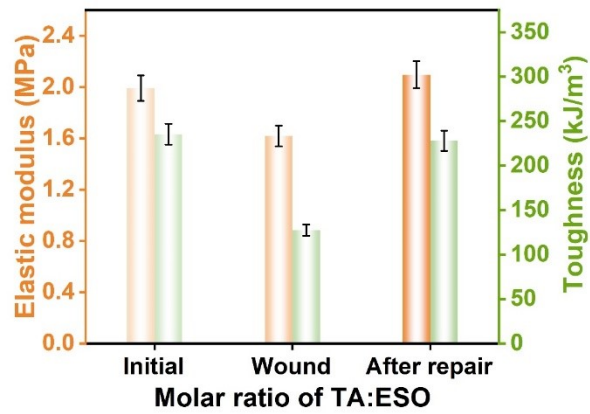

**Figure S20.** Toughness and elastic modulus of the initial material before and after repair.
